# Supplementary material for: OXPHOS Organization and Activity in Mitochondria of Plants with Different Life Strategies
Source: MDPI journal article supplement (doi:10.3390/ijms242015229), 2023-10-16
Supplement: s1 [file s1]

**Table S1.** Apparent masses of the OXPHOS complexes and supercomplexes from pea, winter wheat, and maize shoot mitochondria.

| OXPHOS enzymes                     | Designations                 | Proposed composition                                             | Calculated apparent mass, kDa |              |       |
|------------------------------------|------------------------------|------------------------------------------------------------------|-------------------------------|--------------|-------|
|                                    |                              |                                                                  | Pea                           | Winter wheat | Maize |
| Complex I                          | SC <sub>1</sub>              | I <sub>2</sub> III <sub>2</sub> IV <sub>n</sub>                  | 2830                          | 2790         | –     |
|                                    | SC <sub>2</sub> <sup>*</sup> | I <sub>2</sub> III <sub>2</sub> +SC <sup>IV</sup>                | 2350                          | 2356         | 2350  |
|                                    | SC <sub>3</sub>              | I <sub>1</sub> III <sub>2</sub> IV <sub>2</sub>                  | 2060                          | –            | –     |
|                                    | SC <sub>4</sub>              | I <sub>1</sub> III <sub>2</sub> IV <sub>a</sub>                  | 1830                          | 1810         | 1810  |
|                                    | SC <sub>5</sub>              | I <sub>1</sub> III <sub>2</sub> IV <sub>b</sub>                  | 1750                          | 1744         | 1744  |
|                                    | SC <sub>6</sub>              | I <sub>1</sub> III <sub>2</sub> +IV <sub>1</sub> V <sub>a2</sub> | 1630                          | 1600         | 1600  |
|                                    | I                            |                                                                  | 1130                          | 1130         | 1130  |
| Complex II                         | M                            | (II <sub>x</sub> III <sub>y</sub> IV <sub>z</sub> ) <sub>n</sub> | 3600                          | 3590         | 3590  |
|                                    | II <sub>major</sub>          |                                                                  | 165                           | 88           | 91    |
|                                    | II <sub>minor</sub>          |                                                                  | 90                            | –            | 138   |
| Complex III <sub>2</sub>           |                              |                                                                  | 500                           | 485          | 490   |
| Complex IV                         | M                            | (II <sub>x</sub> III <sub>y</sub> IV <sub>z</sub> ) <sub>n</sub> | 3600                          | 3590         | 3590  |
|                                    | SC <sub>1</sub>              | I <sub>2</sub> III <sub>2</sub> IV <sub>n</sub>                  | 2830                          | 2790         | –     |
|                                    | SC <sub>2</sub> <sup>*</sup> | I <sub>2</sub> III <sub>2</sub> +SC <sup>IV</sup>                | 2350                          | 2356         | 2350  |
|                                    | SC <sub>3</sub>              | I <sub>1</sub> III <sub>2</sub> IV <sub>2</sub>                  | 2060                          | –            | –     |
|                                    | SC <sub>4</sub>              | I <sub>1</sub> III <sub>2</sub> IV <sub>a</sub>                  | 1830                          | 1810         | 1810  |
|                                    | SC <sub>5</sub>              | I <sub>1</sub> III <sub>2</sub> IV <sub>b</sub>                  | 1750                          | 1744         | 1744  |
|                                    | SC <sub>6</sub>              | I <sub>1</sub> III <sub>2</sub> +IV <sub>1</sub> V <sub>a2</sub> | 1630                          | 1600         | 1600  |
|                                    | SC <sub>7</sub>              | III <sub>2</sub> IV <sub>a2</sub>                                | 1260                          | 1205         | 1205  |
|                                    | SC <sub>8</sub>              | III <sub>2</sub> IV <sub>a</sub>                                 | 900                           | 884          | 884   |
|                                    | SC <sub>9</sub>              | III <sub>2</sub> IV <sub>b</sub>                                 | nd                            | 790          | 790   |
|                                    | IV <sub>2</sub>              |                                                                  | 400                           | 340          | 360   |
|                                    | IV <sub>a</sub>              |                                                                  | 300                           | 254          | 260   |
|                                    | IV <sub>b</sub>              |                                                                  | 200                           | 183          | 190   |
| Complex V                          | Vb <sub>2</sub>              |                                                                  | 1330                          | 1300         | 1315  |
|                                    | V <sub>a</sub>               |                                                                  | 780                           | 770          | 785   |
|                                    | V <sub>b</sub>               |                                                                  | 700                           | 690          | 705   |
|                                    | F <sub>1</sub>               |                                                                  | 290                           | 300          | 310   |
| Alternative NAD(P)H dehydrogenases | ND <sub>major</sub>          |                                                                  | 111                           | 116          | 114   |
|                                    |                              |                                                                  | 105                           | –            | –     |

Designations: Complexes I, II, III<sub>2</sub>, IV, and V—individual complexes I, II, III<sub>2</sub>, IV, and V, as well as supercomplexes containing them and corresponding subcomplexes (where indicated); SC—supercomplex; M—megacomplex; II<sub>major/minor</sub>—major and minor forms of complex II; ND<sub>major</sub>—major forms of alternative NAD(P)H dehydrogenases. SC<sub>2</sub><sup>\*</sup>—instead of the previously assumed respirasome I<sub>2</sub>III<sub>2</sub>IV<sub>n</sub>, two associations could comigrate in this band: I<sub>2</sub>III<sub>2</sub> and minor complex IV-containing supercomplex of unknown composition (discussed in more detail in the caption of Figure 1 and in Subsection 2.3). The calculated masses of supercomplexes above 1700 kDa, i.e., above the highest molecular weight standard (Subsection 4.5), are given in italics because the absence of corresponding standards in the highest molecular weight region does not make it possible to accurately estimate their molecular weights [19]. The rounded mean values based on analysis of 15 BN-gels are presented.

**Table S2.** Relative abundance and NADH-dehydrogenase activity of supercomplexes SC<sub>1-6</sub> and monocomplex I in digitonin solubilizates of pea, winter wheat, and maize shoot mitochondria.

| Estimated parameters  | Designation                      | Putative composition                                             | Pea                     | Winter wheat            | Maize                   |
|-----------------------|----------------------------------|------------------------------------------------------------------|-------------------------|-------------------------|-------------------------|
| Relative abundance, % | SC <sub>1</sub>                  | I <sub>2</sub> III <sub>2</sub> IV <sub>n</sub>                  | 5.2 <sup>a</sup> ± 1.0  | 0.9 <sup>b</sup> ± 0.3  | –                       |
|                       | SC <sub>2</sub>                  | I <sub>2</sub> III <sub>2</sub> +SC <sup>IV</sup>                | 19.1 <sup>a</sup> ± 1.2 | 18.5 <sup>a</sup> ± 0.7 | 16.9 <sup>b</sup> ± 0.6 |
|                       | SC <sub>3</sub>                  | I <sub>1</sub> III <sub>2</sub> IV <sub>n</sub>                  | 5.9 ± 1.4               | –                       | –                       |
|                       | SC <sub>4</sub>                  | I <sub>1</sub> III <sub>2</sub> IV <sub>a</sub>                  | 6.4 <sup>a</sup> ± 0.6  | 13.2 <sup>b</sup> ± 1.1 | 12.1 <sup>b</sup> ± 1.3 |
|                       | SC <sub>5</sub>                  | I <sub>1</sub> III <sub>2</sub> IV <sub>b</sub>                  | 2.2 <sup>a</sup> ± 0.4  | 15.1 <sup>b</sup> ± 0.6 | 8.6 <sup>c</sup> ± 1.2  |
|                       | SC <sub>6</sub>                  | I <sub>1</sub> III <sub>2</sub> +IV <sub>1</sub> V <sub>a2</sub> | 52.3 <sup>a</sup> ± 2.4 | 46.9 <sup>b</sup> ± 1.1 | 51.4 <sup>a</sup> ± 2.4 |
|                       | Σ SC <sub>1-6</sub>              |                                                                  | 91.1 <sup>a</sup> ± 0.8 | 94.6 <sup>b</sup> ± 0.4 | 89.0 <sup>c</sup> ± 0.7 |
|                       | CI                               |                                                                  | 8.9 <sup>a</sup> ± 0.8  | 5.4 <sup>b</sup> ± 0.4  | 11.0 <sup>c</sup> ± 0.7 |
|                       | SC <sub>6</sub> /SC <sub>2</sub> |                                                                  | 2.7                     | 2.5                     | 3                       |
| Relative activity, %  | SC <sub>1</sub>                  | I <sub>2</sub> III <sub>2</sub> IV <sub>n</sub>                  | 6.1 <sup>a</sup> ± 1.0  | 1.1 <sup>b</sup> ± 0.2  | –                       |
|                       | SC <sub>2</sub>                  | I <sub>2</sub> III <sub>2</sub> +SC <sup>IV</sup>                | 21.0 <sup>a</sup> ± 1.6 | 21.4 <sup>a</sup> ± 1.2 | 19.4 <sup>b</sup> ± 0.9 |
|                       | SC <sub>3</sub>                  | I <sub>1</sub> III <sub>2</sub> IV <sub>n</sub>                  | 4.5 ± 0.9               | –                       | –                       |
|                       | SC <sub>4</sub>                  | I <sub>1</sub> III <sub>2</sub> IV <sub>a</sub>                  | 5.3 <sup>a</sup> ± 0.4  | 12.8 <sup>b</sup> ± 0.4 | 11.3 <sup>c</sup> ± 1.3 |
|                       | SC <sub>5</sub>                  | I <sub>1</sub> III <sub>2</sub> IV <sub>b</sub>                  | 1.6 <sup>a</sup> ± 0.2  | 13.5 <sup>b</sup> ± 0.2 | 7.3 <sup>c</sup> ± 0.7  |
|                       | SC <sub>6</sub>                  | I <sub>1</sub> III <sub>2</sub> +IV <sub>1</sub> V <sub>a2</sub> | 49.5 <sup>a</sup> ± 2.4 | 44.3 <sup>b</sup> ± 1.8 | 50.3 <sup>a</sup> ± 2.1 |
|                       | Σ SC <sub>1-6</sub>              |                                                                  | 87.9 <sup>a</sup> ± 2.0 | 93.2 <sup>b</sup> ± 0.9 | 88.4 <sup>a</sup> ± 0.7 |
|                       | CI                               |                                                                  | 12.1 <sup>a</sup> ± 2.0 | 6.8 <sup>b</sup> ± 0.9  | 11.6 <sup>a</sup> ± 0.7 |

ΣSC<sub>1-6</sub>—sum of values for SC<sub>1-6</sub>. Relative abundance or activity of each supercomplex and monocomplex I was calculated as a percentage of total intensity (total integrated density) of all complex I-containing bands. SC<sub>6</sub>/SC<sub>2</sub>—relative abundance ratio of supercomplexes SC<sub>6</sub> and SC<sub>2</sub>. The mean values and standard deviations are given. The same letters indicate the absence of significant differences between the species for every analysed structure (or sum of them); different letters show statistically significant differences ( $P \leq 0.001$ ).

**Table S3.** Activity of winter wheat and maize complex I in comparison with that of pea enzyme.

| Estimated parameters  | Designation            | Pea              | Winter wheat                | Maize                      |
|-----------------------|------------------------|------------------|-----------------------------|----------------------------|
| Relative abundance, % | SC <sub>2</sub>        | 100 <sup>a</sup> | 88.3 <sup>b</sup> ± 9.2     | 86.7 <sup>b</sup> ± 7.8    |
|                       | SC <sub>4</sub>        | 100 <sup>a</sup> | 188.0 <sup>b</sup> ± 17.4   | 185.9 <sup>b</sup> ± 17.9  |
|                       | SC <sub>5</sub>        | 100 <sup>a</sup> | 637.5 <sup>b</sup> ± 97.8   | 398.3 <sup>c</sup> ± 113.0 |
|                       | SC <sub>6</sub>        | 100 <sup>a</sup> | 82.1 <sup>b</sup> ± 5.3     | 96.9 <sup>c</sup> ± 8.4    |
|                       | ΣSC <sub>2, 4-6</sub>  | 100 <sup>a</sup> | 106.9 <sup>b</sup> ± 6.4    | 109.3 <sup>b</sup> ± 6.5   |
|                       | CI                     | 100 <sup>a</sup> | 56.7 <sup>b</sup> ± 9.8     | 122.9 <sup>c</sup> ± 17.3  |
|                       | ΣSC <sub>1-6</sub> +CI | 100 <sup>a</sup> | 91.4 <sup>b</sup> ± 4.8     | 98.2 <sup>a</sup> ± 3.6    |
| Relative activity, %  | SC <sub>2</sub>        | 100 <sup>a</sup> | 123.3 <sup>b</sup> ± 15.3   | 81.3 <sup>c</sup> ± 10.7   |
|                       | SC <sub>4</sub>        | 100 <sup>a</sup> | 292.4 <sup>b</sup> ± 33.9   | 188.3 <sup>c</sup> ± 24.9  |
|                       | SC <sub>5</sub>        | 100 <sup>a</sup> | 1042.8 <sup>b</sup> ± 149.1 | 407.1 <sup>c</sup> ± 38.6  |
|                       | SC <sub>6</sub>        | 100 <sup>a</sup> | 107.5 <sup>a</sup> ± 7.1    | 89.0 <sup>b</sup> ± 8.0    |
|                       | ΣSC <sub>2, 4-6</sub>  | 100 <sup>a</sup> | 143.0 <sup>b</sup> ± 9.8    | 99.9 <sup>a</sup> ± 5.9    |
|                       | CI                     | 100 <sup>a</sup> | 68.6 <sup>b</sup> ± 7.7     | 86.0 <sup>c</sup> ± 15.3   |
|                       | ΣSC <sub>1-6</sub> +CI | 100 <sup>a</sup> | 120.0 <sup>b</sup> ± 6.0    | 87.3 <sup>c</sup> ± 3.4    |
| Activity/abundance    | SC <sub>2</sub>        | 1 <sup>a</sup>   | 1.4 <sup>b</sup> ± 0.1      | 0.9 <sup>a</sup> ± 0.1     |
|                       | SC <sub>4</sub>        | 1 <sup>a</sup>   | 1.6 <sup>b</sup> ± 0.2      | 1.0 <sup>a</sup> ± 0.1     |
|                       | SC <sub>5</sub>        | 1 <sup>a</sup>   | 1.7 <sup>b</sup> ± 0.2      | 1.1 <sup>a</sup> ± 0.3     |
|                       | SC <sub>6</sub>        | 1 <sup>a</sup>   | 1.3 <sup>b</sup> ± 0.1      | 0.9 <sup>c</sup> ± 0.05    |
|                       | ΣSC <sub>2, 4-6</sub>  | 1 <sup>a</sup>   | 1.3 <sup>b</sup> ± 0.1      | 0.9 <sup>c</sup> ± 0.03    |
|                       | CI                     | 1 <sup>a</sup>   | 1.2 <sup>b</sup> ± 0.2      | 0.7 <sup>c</sup> ± 0.1     |
|                       | ΣSC <sub>1-6</sub> +CI | 1 <sup>a</sup>   | 1.3 <sup>b</sup> ± 0.1      | 0.9 <sup>c</sup> ± 0.01    |

For comparison, abundance, activity, and the activity/abundance ratio of pea enzyme were taken as 100% and unit, respectively. The designations are the same as in Table S2. ΣSC<sub>2, 4-6</sub>, ΣSC<sub>1-6</sub>+CI—comparison of total abundance, activity or activity/abundance values for SC<sub>2, 4-6</sub> or supercomplexes SC<sub>1-6</sub> and monocomplex I, respectively. The mean values and standard deviations are given. The same letters indicate the absence of significant differences between the species for every evaluated OXPHOS component (or their sum). Different letters show statistically significant differences ( $P \leq 0.001$ ).

**Table S4.** Relative activity of free and superassembled complex IV solubilized from pea, winter wheat, and maize mitochondria.

| CIV               | Pea                     | Winter wheat            | Maize                   |
|-------------------|-------------------------|-------------------------|-------------------------|
| M                 | 12.8 <sup>a</sup> ± 1.2 | 4.5 <sup>b</sup> ± 0.7  | 7.9 <sup>c</sup> ± 0.8  |
| SC <sub>1-5</sub> | 8.3 <sup>a</sup> ± 0.9  | 4.4 <sup>b</sup> ± 0.7  | 3.0 <sup>c</sup> ± 1.3  |
| SC <sub>7-9</sub> | 2.2 <sup>a</sup> ± 0.2  | 5.3 <sup>b</sup> ± 2.0  | 5.2 <sup>b</sup> ± 1.5  |
| ΣSCs              | 10.5 <sup>a</sup> ± 1.1 | 9.8 <sup>a</sup> ± 2.7  | 8.2 <sup>a</sup> ± 2.8  |
| ΣSCs, M           | 23.3 <sup>a</sup> ± 2.1 | 14.3 <sup>b</sup> ± 3.3 | 16.0 <sup>b</sup> ± 2.2 |
| IV <sub>2</sub>   | 17.4 <sup>a</sup> ± 0.3 | 11.8 <sup>b</sup> ± 0.7 | 24.3 <sup>c</sup> ± 0.5 |
| IVa               | 45.4 <sup>a</sup> ± 3.6 | 34.8 <sup>b</sup> ± 0.6 | 43.8 <sup>a</sup> ± 1.1 |
| IVb               | 13.9 <sup>a</sup> ± 1.9 | 39.1 <sup>b</sup> ± 4.2 | 15.9 <sup>a</sup> ± 2.7 |
| ΣIV               | 76.7 <sup>a</sup> ± 2.1 | 85.7 <sup>b</sup> ± 3.3 | 84.0 <sup>b</sup> ± 2.2 |

Designations are the same as in Table S2. CIV—complex IV activity in megacomplex, supercomplexes SC<sub>1-5</sub>, SC<sub>7-9</sub> and dimeric IV<sub>2</sub> and monomeric IVa/b forms. SC<sub>1-5</sub>, SC<sub>7-9</sub>, ΣSCs and ΣSCs, M—total cytochrome *c* oxidase activity in SC<sub>1-5</sub>, SC<sub>7-9</sub>, all supercomplexes or supercomplexes and megacomplex, respectively. ΣIV—total activity of dimer IV<sub>2</sub> and monomers IVa/b. The mean values and standard deviations are given. The same letters indicate the absence of significant differences between the species; different letters show statistically significant differences ( $P \leq 0.001$ ).

**Table S5.** Relative abundance of complex V forms solubilized from pea, winter wheat, and maize mitochondria.

| CV forms        | Pea                     | Winter wheat            | Maize                   |
|-----------------|-------------------------|-------------------------|-------------------------|
| Vb <sub>2</sub> | 1.1 <sup>a</sup> ± 0.6  | 15.7 <sup>b</sup> ± 2.2 | 23.4 <sup>c</sup> ± 2.6 |
| Va              | 30.5 <sup>a</sup> ± 1.2 | 31.5 <sup>a</sup> ± 1.4 | 37.2 <sup>b</sup> ± 2.0 |
| Vb              | 67.2 <sup>a</sup> ± 1.3 | 51.1 <sup>b</sup> ± 3.2 | 32.1 <sup>c</sup> ± 3.0 |
| ΣVa/b           | 97.7 <sup>a</sup> ± 0.4 | 82.6 <sup>b</sup> ± 2.3 | 69.4 <sup>c</sup> ± 1.8 |
| F <sub>1</sub>  | 1.3 <sup>a</sup> ± 0.4  | 1.7 <sup>a</sup> ± 0.1  | 7.2 <sup>b</sup> ± 1.0  |

Complex V forms visible on Coomassie-stained BN-gels were analyzed. Vb<sub>2</sub>—dimer of form Vb; Va and Vb—monocomplexes Va/b; ΣVa/b—sum of values for forms Va/b; F<sub>1</sub>—subcomplex F<sub>1</sub> of ATP synthase. Component F<sub>1</sub> from pea mitochondria dissociated further into components, F<sub>1</sub><sup>\*</sup>, which were not taken into account due to the difficulty of detection on Coomassie-stained gels. The mean values and standard deviations are given. The same letters indicate the absence of significant differences between the species; different letters show statistically significant differences ( $P \leq 0.001$ ).

**Table S6.** Comparison of coupling states of mitochondria from etiolated pea, winter wheat, and maize shoots based on the available literature data.

| Oxidation substrate | Plant species | RC                       | References                 |
|---------------------|---------------|--------------------------|----------------------------|
| Malate              | Pea           | 3.69 <sup>a</sup> ± 0.13 | Kolesnichenko et al., 2003 |
|                     | Winter wheat  | 3.37 <sup>b</sup> ± 0.11 |                            |
|                     | Maize         | 3.36 <sup>b</sup> ± 0.32 |                            |
| Succinate           | Pea           | 2.15 <sup>a</sup> ± 0.01 | Grabelnych et al., 2004    |
|                     | Winter wheat  | 1.47 <sup>b</sup> ± 0.03 |                            |
|                     | Maize         | 1.90 <sup>c</sup> ± 0.23 |                            |
| NADH                | Pea           | 1.41 <sup>a</sup> ± 0.07 | Grabelnych et al., 2004    |
|                     | Winter wheat  | 1.16 <sup>b</sup> ± 0.04 |                            |
|                     | Maize         | 1.21 <sup>b</sup> ± 0.03 |                            |

Oxidation substrates: 10 mM malate in the presence of 10 mM glutamate, 8 mM succinate in the presence of 5mM glutamate, and 1mM NADH with the addition 0.06 mM CaCl<sub>2</sub>. The mean values of respiratory controls (RC) and standard deviations are given. The same letters indicate the absence of significant differences between the species; different letters show statistically significant differences ( $P < 0.050$ ).

**Table S7.** Protein quantification and control of equal protein loading.

| Species      |   | Bradford assay                                   |                                            | Track intensity (Image J), % |
|--------------|---|--------------------------------------------------|--------------------------------------------|------------------------------|
|              |   | Protein concentration, $\mu\text{g}/\mu\text{l}$ | Protein loading, $\mu\text{g}/\text{well}$ |                              |
| Pea          | 1 | $13.9^a \pm 1.3$                                 | $77.8^a \pm 7.2$                           | 100 <sup>a</sup>             |
|              | 2 | $13.8^a \pm 1.7$                                 | $80.3^a \pm 9.8$                           | $99.9^a \pm 2.3$             |
| Winter wheat | 1 | $8.1^b \pm 1.6$                                  | $77.4^a \pm 15.9$                          | $100.4^a \pm 3.2$            |
|              | 2 | $8.3^b \pm 2.6$                                  | $79.1^a \pm 25.1$                          | $99.2^a \pm 5.0$             |
| Maize        | 1 | $8.3^b \pm 2.4$                                  | $82.8^a \pm 23.4$                          | $99.1^a \pm 4.0$             |
|              | 2 | $7.1^b \pm 1.4$                                  | $77.9^a \pm 15.2$                          | $98.1^a \pm 0.8$             |

Protein quantification via a Bradford assay and data on protein loading as well as track intensities are given. Equal loading control and final fine equalization of the samples were carried out by means of total track intensity measurements using Image J software. Two biological replicates for every species with total 8-10 technical (4-5 for every replicate) and 24-30 analytical repetitions (12-15 for every one) were performed for protein quantification. Two biological, well-reproducible replicates were used to place two analytical repetitions for each biological replicate on the same gel (6 tracks x 2 repetitions, the first repetition was intended for abundance and the second one for activity) and to properly analyze the relative abundance and activity of the assembled and free OXPHOS enzymes. Overall, three technical repetitions for each biological replicate and six analytical repetitions for each species (for abundance or activity estimation) were produced. For track intensity comparisons, one pea replicate was taken as 100%. The mean values and standard deviations are shown. The same letters indicate the absence of significant differences between the replicates and species; different letters show statistically significant differences at the  $P \leq 0.001$  level.

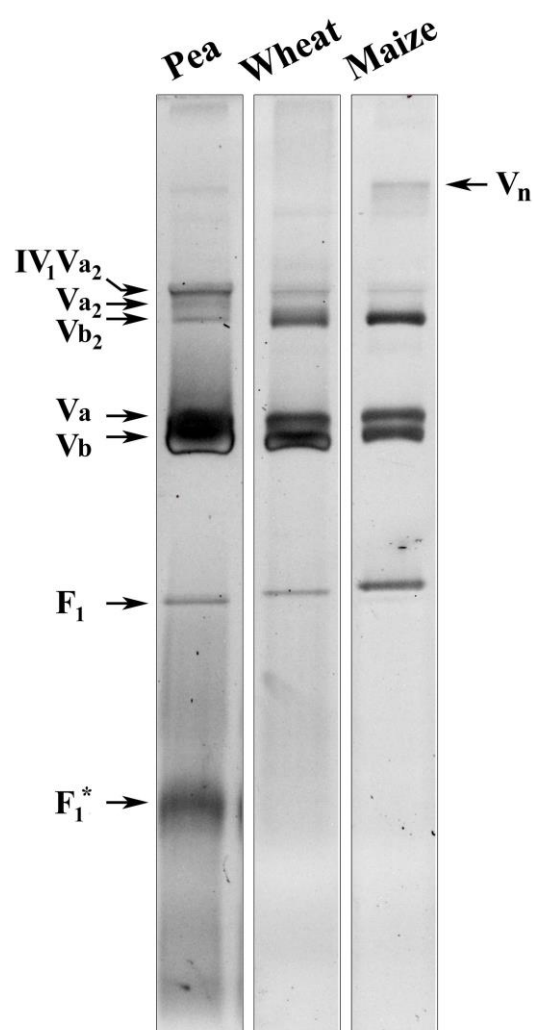

**Figure S1.** Digitonin-solubilized and BN-separated forms of complex V from pea, winter wheat, and maize shoot mitochondria. Results of in-gel ATPase activity staining are presented. Designations are the same as in Figure 1. The scanning was carried out using a Gel Doc Imaging system. In this scan mode, the ATPase activity of supercomplex  $IV_1Va_2$  in the band  $SC_6$  was visible not only in pea, but also in minor amounts in winter wheat and maize. In maize, additional ATPase activity was detected in the 2760 kDa region, close in mass to  $SC_1$ , which apparently could be an oligomeric form of ATP synthase ( $V_n$ ).



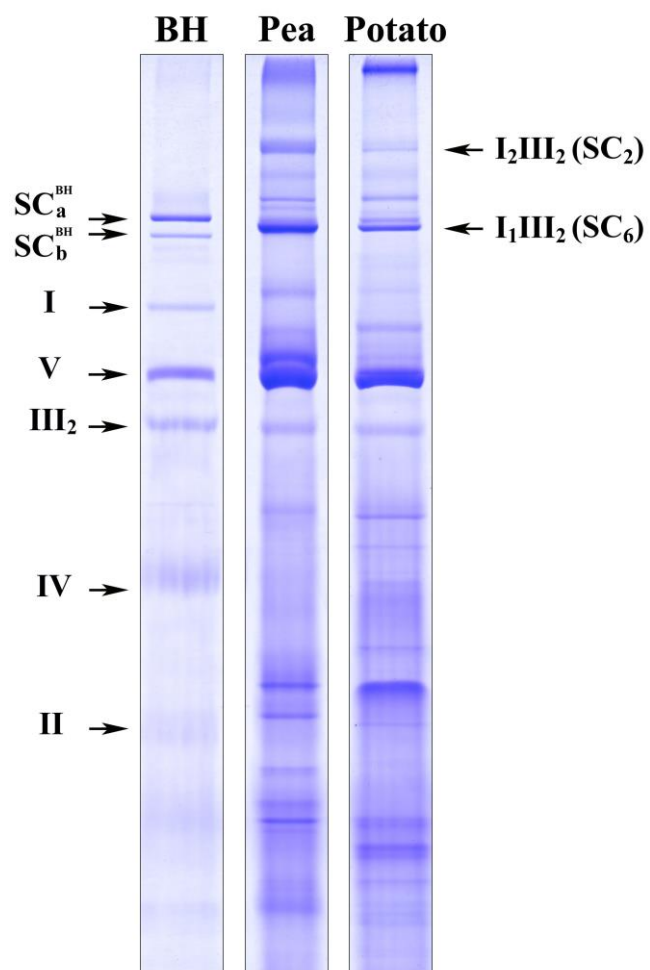

**Figure S2.** The complex I-containing supercomplexes of potato tubers and pea mitochondria have similar apparent molecular masses. BH—bovine heart OXPHOS supercomplexes and complexes used as standard proteins;  $SCa^{BH}$ ,  $SCb^{BH}$ —supercomplexes  $I_1III_2IV_1$  and  $I_1III_2$  from bovine heart mitochondria, respectively; I, V,  $III_2$ , IV and II—corresponding OXPHOS complexes.

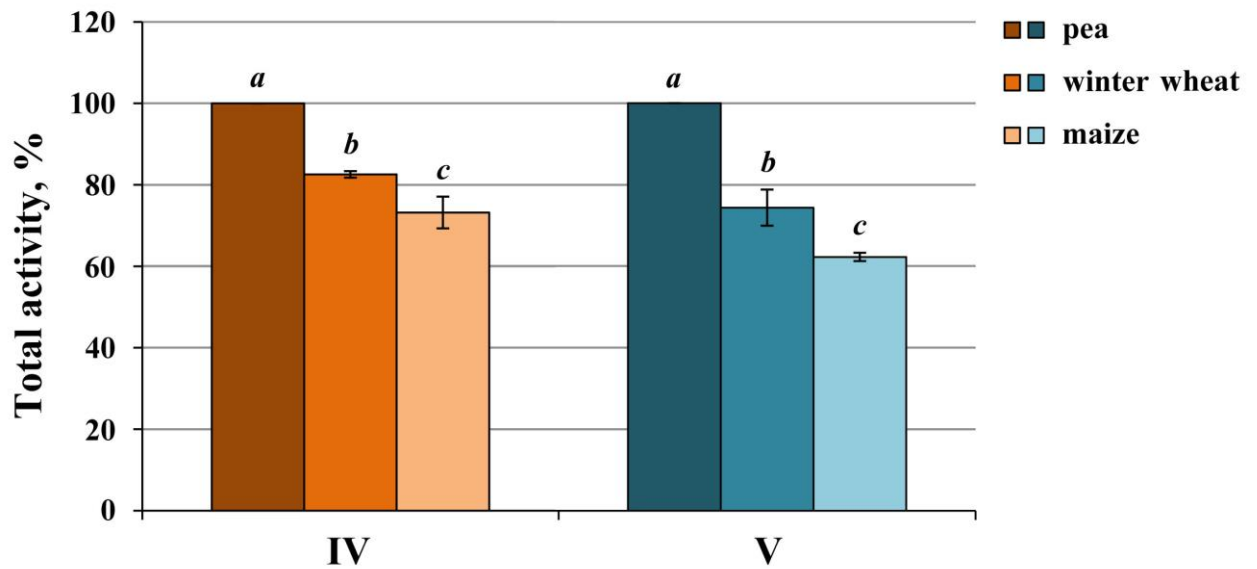

**Figure S3.** Total activity of mitochondrial cytochrome *c* oxidase and ATP synthase of winter wheat and maize in comparison with that of pea. IV—total activity of cytochrome *c* oxidase, which was calculated as sum of the integrated densities (IntDen) of complex IV activity bands (complex IV-containing megacomplex and supercomplexes, free IV<sub>2</sub>, and forms IVa/b). V—total activity of ATP synthase, which was sum of integrated densities (IntDen) of Va/b and Vb<sub>2</sub> activity bands. The enzyme activity of pea was taken as 100%. For correct comparison, the complex V activity of winter wheat and maize was calculated for 100% abundance (of the complex V forms), normalized to pea. This was not done for the complex IV activity estimation due to difficulty of the enzyme's accurate quantification on 1D BN-gel (Subsection 2.3). The total complex IV activity for winter wheat was 82.6% ± 0.8%; for maize it was 73.2% ± 3.9% (relative to that of pea). Total complex V activity for winter wheat was 74.4% ± 4.4%; for maize it was 62.3% ± 1.0%. The mean values and standard deviations are given. Different letters indicate significant differences at the  $P \leq 0.001$  level.
